# Supplementary material
Source: MDPI journal article supplement (https://www.mdpi.com/1999-4907/14/3/553)
Supplement: s1 [file s1]

## Supplementary Materials

**Table S1.** Vegetation survey sample site information at the Ziwuling study area on the Chinese Loess Plateau.

| Restoration age (yr) | Succession stage                         | Numbers of sites | Representative Plants                                                                                         |
|----------------------|------------------------------------------|------------------|---------------------------------------------------------------------------------------------------------------|
| 0                    | Farmland                                 | 6                | <i>Viola collina</i> ; <i>Agropyron cristatum</i> .                                                           |
| 10                   | Natural restoration of 10 years of grass | 6                | <i>Bothriochloa ischaemum</i> ; <i>Artemisia chamaemelifolia</i> ; <i>Lespedeza bicolor</i> .                 |
| 20                   | Natural restoration of 20 years of grass | 6                | <i>Artemisia codonocephala</i> ; <i>Agrimonia pilosa</i> ; <i>Lespedeza bicolor</i> .                         |
| 40                   | Shrub stage                              | 6                | <i>Sophora davidii</i> ; <i>Lespedeza bicolor</i> ; <i>Agropyron cristatum</i> ; <i>Anemone chinensis</i> .   |
| 70                   | Pioneer arbor stage                      | 6                | <i>Betula platyphylla</i> ; <i>Spiraea salicifolia</i> ; <i>Lespedeza bicolor</i> ; <i>Carex lanceolata</i> . |
| 120                  | Sub-top stage                            | 6                | <i>Pinus tabuliformis</i> ; <i>Lespedeza bicolor</i> ; <i>Carex lanceolata</i> .                              |
| 135                  | Sub-top to top transition stage          | 6                | <i>Pinus tabuliformis</i> ; <i>Quercus mongolica</i> ; <i>Lespedeza bicolor</i> ; <i>Carex lanceolata</i> .   |
| 150                  | Top Stage                                | 6                | <i>Quercus mongolica</i> ; <i>Lespedeza bicolor</i> ; <i>Carex lanceolata</i> .                               |

**Table S2.** The 128 species of seed plants included in the vegetation restoration sequence of this study.

| No. | Species                             | No. | Species                            |
|-----|-------------------------------------|-----|------------------------------------|
| 1   | <i>Acer pictum</i>                  | 65  | <i>Koelreuteria paniculata</i>     |
| 2   | <i>Acer pilosum</i>                 | 66  | <i>Lactuca indica</i>              |
| 3   | <i>Acer tataricum</i> subsp.ginnala | 67  | <i>Lespedeza bicolor</i>           |
| 4   | <i>Adenophora stricta</i>           | 68  | <i>Lespedeza tomentosa</i>         |
| 5   | <i>Agrimonia pilosa</i>             | 69  | <i>Lonicera japonica</i>           |
| 6   | <i>Agropyron cristatum</i>          | 70  | <i>Lysimachia barystachys</i>      |
| 7   | <i>Ambrosia artemisiifolia</i>      | 71  | <i>Lysimachia fortunei</i>         |
| 8   | <i>Amethystea caerulea</i>          | 72  | <i>Malus baccata</i>               |
| 9   | <i>Ampelopsis glandulosa</i>        | 73  | <i>Miscanthus sinensis</i>         |
| 10  | <i>Anemone chinensis</i>            | 74  | <i>Ostryopsis davidiana</i>        |
| 11  | <i>Anemone vitifolia</i>            | 75  | <i>Panicum miliaceum</i>           |
| 12  | <i>Artemisia argyi</i>              | 76  | <i>Parthenocissus tricuspidata</i> |
| 13  | <i>Artemisia capillaris</i>         | 77  | <i>Patrinia rupestris</i>          |
| 14  | <i>Artemisia carvifolia</i>         | 78  | <i>Patrinia scabiosifolia</i>      |
| 15  | <i>Artemisia chamaemelifolia</i>    | 79  | <i>Periploca sepium</i>            |
| 16  | <i>Artemisia codonocephala</i>      | 80  | <i>Peucedanum praeruptorum</i>     |
| 17  | <i>Artemisia kanashiroi</i>         | 81  | <i>Phlomis umbrosa</i>             |
| 18  | <i>Artemisia lancea</i>             | 82  | <i>Phragmites australis</i>        |
| 19  | <i>Aster hispidus</i>               | 83  | <i>Pinus tabuliformis</i>          |

| 20  | <i>Aster tataricus</i>            | 84  | <i>Pistacia chinensis</i>                              |
|-----|-----------------------------------|-----|--------------------------------------------------------|
| 21  | <i>Atractylodes lancea</i>        | 85  | <i>Plantago asiatica</i>                               |
| 22  | <i>Avena fatua</i>                | 86  | <i>Platycladus orientalis</i>                          |
| No. | Species                           | No. | Species                                                |
| 23  | <i>Berberis amurensis</i>         | 87  | <i>Polygonatum odoratum</i>                            |
| 24  | <i>Betula platyphylla</i>         | 88  | <i>Populus simonii</i>                                 |
| 25  | <i>Bothriochloa ischaemum</i>     | 89  | <i>Potentilla chinensis</i>                            |
| 26  | <i>Bupleurum chinense</i>         | 90  | <i>Potentilla discolor</i>                             |
| 27  | <i>Bupleurum scorzonerifolium</i> | 91  | <i>Potentilla reptans</i>                              |
| 28  | <i>Campylotropis macrocarpa</i>   | 92  | <i>Prunus davidiana</i>                                |
| 29  | <i>Carex lanceolata</i>           | 93  | <i>Prunus triloba</i>                                  |
| 30  | <i>Carpesium abrotanoides</i>     | 94  | <i>Pyrus betulifolia</i>                               |
| 31  | <i>Carpesium cernuum</i>          | 95  | <i>Quercus mongolica</i>                               |
| 32  | <i>Carya cathayensis</i>          | 96  | <i>Rhamnus davurica</i>                                |
| 33  | <i>Celtis sinensis</i>            | 97  | <i>Rhamnus globosa</i>                                 |
| 34  | <i>Chrysanthemum indicum</i>      | 98  | <i>Rhamnus utilis</i>                                  |
| 35  | <i>Chrysanthemum zawadskii</i>    | 99  | <i>Rhaponticum uniflorum</i>                           |
| 36  | <i>Cirsium arvense</i>            | 100 | <i>Rosa multiflora</i>                                 |
| 37  | <i>Cirsium japonicum</i>          | 101 | <i>Rosa xanthina</i>                                   |
| 38  | <i>Clematis florida</i>           | 102 | <i>Rubia cordifolia</i>                                |
| 39  | <i>Clinopodium chinense</i>       | 103 | <i>Rubus parvifolius</i>                               |
| 40  | <i>Corylus heterophylla</i>       | 104 | <i>Sanguisorba officinalis</i>                         |
| 41  | <i>Cotoneaster multiflorus</i>    | 105 | <i>Saussurea japonica</i>                              |
| 42  | <i>Crataegus pinnatifida</i>      | 106 | <i>Senecio scandens</i>                                |
| 43  | <i>Cynodon dactylon</i>           | 107 | <i>Smilax china</i>                                    |
| 44  | <i>Cyperus compressus</i>         | 108 | <i>Sophora davidii</i>                                 |
| 45  | <i>Dendranthema chanelii</i>      | 109 | <i>Sophora flavescens</i>                              |
| 46  | <i>Desmodium heterocarpon</i>     | 110 | <i>Spiraea salicifolia</i>                             |
| 47  | <i>Digitaria sanguinalis</i>      | 111 | <i>Syringa reticulata</i> subsp. <i>pekinensis</i>     |
| 48  | <i>Dipsacus asper</i>             | 112 | <i>Taraxacum mongolicum</i>                            |
| 49  | <i>Duchesnea indica</i>           | 113 | <i>Thalictrum aquilegifolium</i> var. <i>sibiricum</i> |
| 50  | <i>Elaeagnus pungens</i>          | 114 | <i>Themeda triandra</i>                                |
| 51  | <i>Eleusine indica</i>            | 115 | <i>Tilia tuan</i>                                      |
| 52  | <i>Epipactis helleborine</i>      | 116 | <i>Torilis scabra</i>                                  |
| 53  | <i>Erigeron annuus</i>            | 117 | <i>Ulmus davidiana</i> var. <i>japonica</i>            |
| 54  | <i>Erodium stephanianum</i>       | 118 | <i>Ulmus glaucescens</i>                               |
| 55  | <i>Euonymus alatus</i>            | 119 | <i>Ulmus laciniata</i>                                 |
| 56  | <i>Euphorbia humifusa</i>         | 120 | <i>Ulmus pumila</i>                                    |
| 57  | <i>Gentiana zollingeri</i>        | 121 | <i>Viburnum dilatatum</i>                              |
| 58  | <i>Geranium wilfordii</i>         | 122 | <i>Vicia unijuga</i>                                   |
| 59  | <i>Geum aleppicum</i>             | 123 | <i>Viola acuminata</i>                                 |
| 60  | <i>Glycyrrhiza uralensis</i>      | 124 | <i>Viola collina</i>                                   |
| 61  | <i>Hibiscus trionum</i>           | 125 | <i>Viola philippica</i>                                |
| 62  | <i>Hypochaeris ciliata</i>        | 126 | <i>Vitex negundo</i>                                   |

63 *Inula japonica*  
64 *Ixeris polycephala*

127 *Xanthium strumarium*  
128 *Ziziphus jujuba* var.*spinosa*

---
